# Supplementary material
Source: PubMed Central journal article supplement (PMC3800155)
Supplement: NIHMS515797-supplement-1_si_001.pdf [file NIHMS515797-supplement-1_si_001.pdf]

## **Protein-Like Tertiary Folding Behavior from Heterogeneous Backbones**

Zachary E. Reinert, George A. Lengyel, and W. Seth Horne\*

*Department of Chemistry, University of Pittsburgh, Pittsburgh, PA 15260.*

### **SUPPORTING INFORMATION**

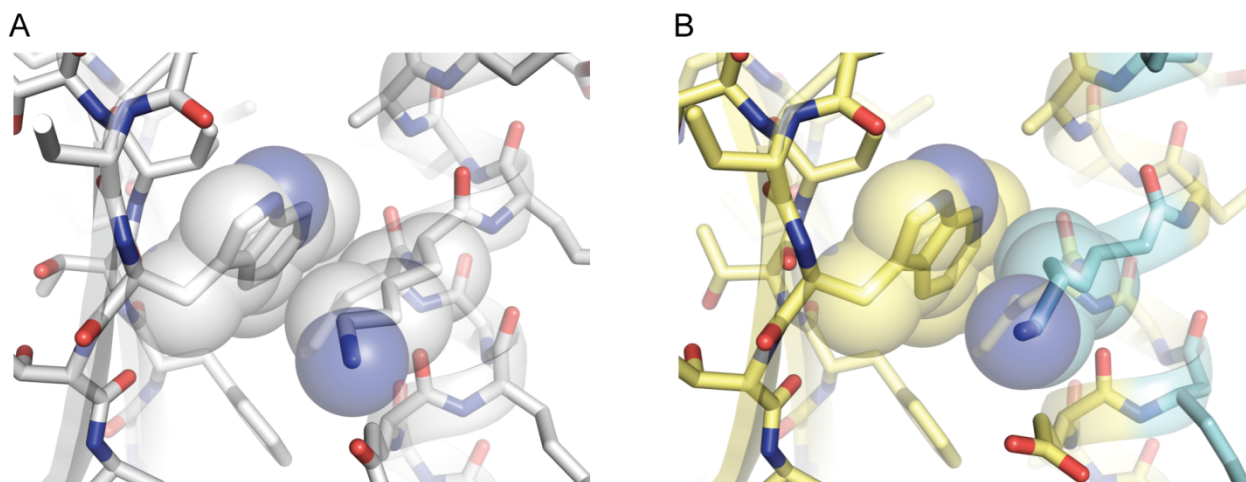

**Figure S1.** Packing interactions involving (A) Lys<sub>31</sub> in wild-type protein **1** and (B)  $\beta^3$ -Lys<sub>31</sub> in helix-modified variant **2**.

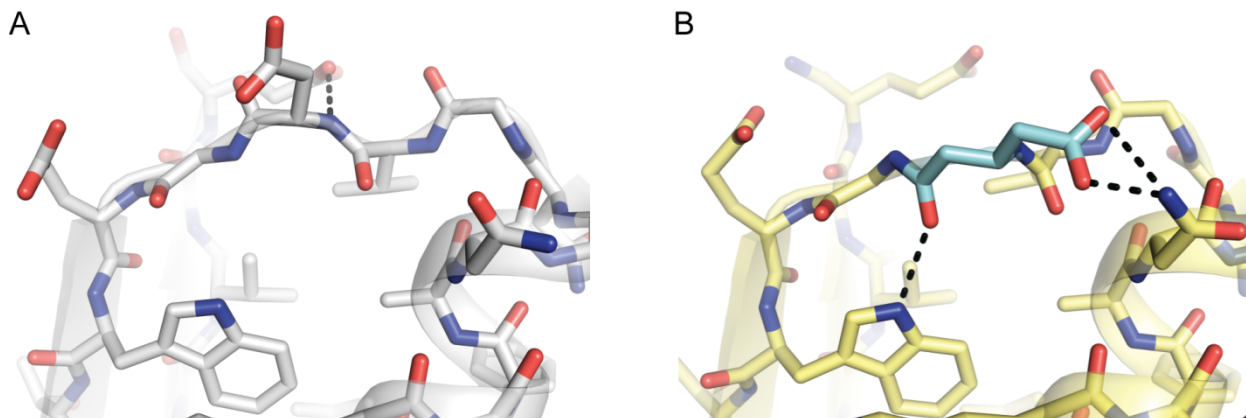

**Figure S2.** Polar contacts involving (A) Asp<sub>40</sub> in wild-type protein **1** and (B)  $\beta^3$ -Asp<sub>40</sub> in loop-modified variant **3**.

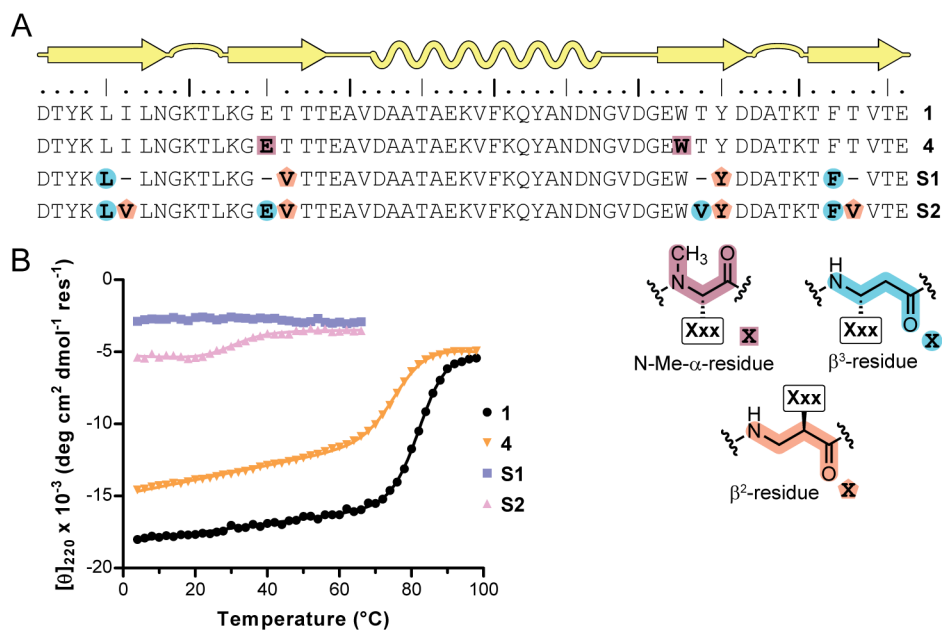

**Figure S3.** Chemical structures (A) and temperature-dependent CD data (B) for wild-type GB1 (**1**) and sheet-modified variants **4**, **S1**, and **S2**. The folds of proteins **S1** and **S2**, based on sequence-guided modification of the sheet with  $\beta^3$ -residues and  $\beta^2$ -residues, were drastically destabilized relative to wild-type GB1.

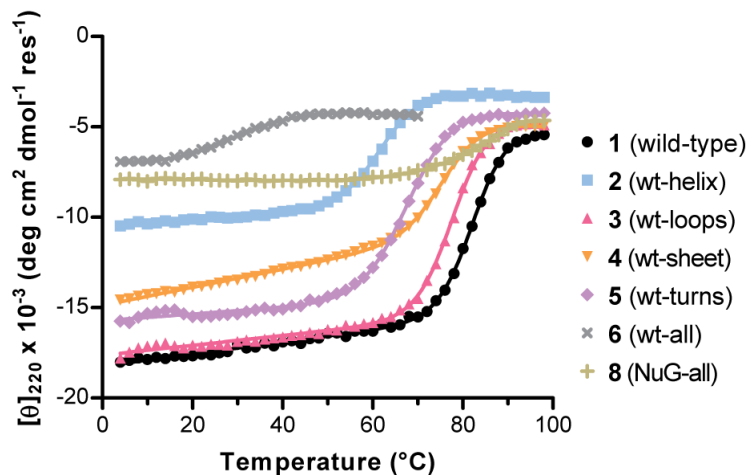

**Figure S4.** Raw molar ellipticity data from temperature-dependent CD measurements on proteins **1-6** and **8**. Values in Figure 2B, based on the data shown here, are normalized to percent unfolded for ease of comparison.

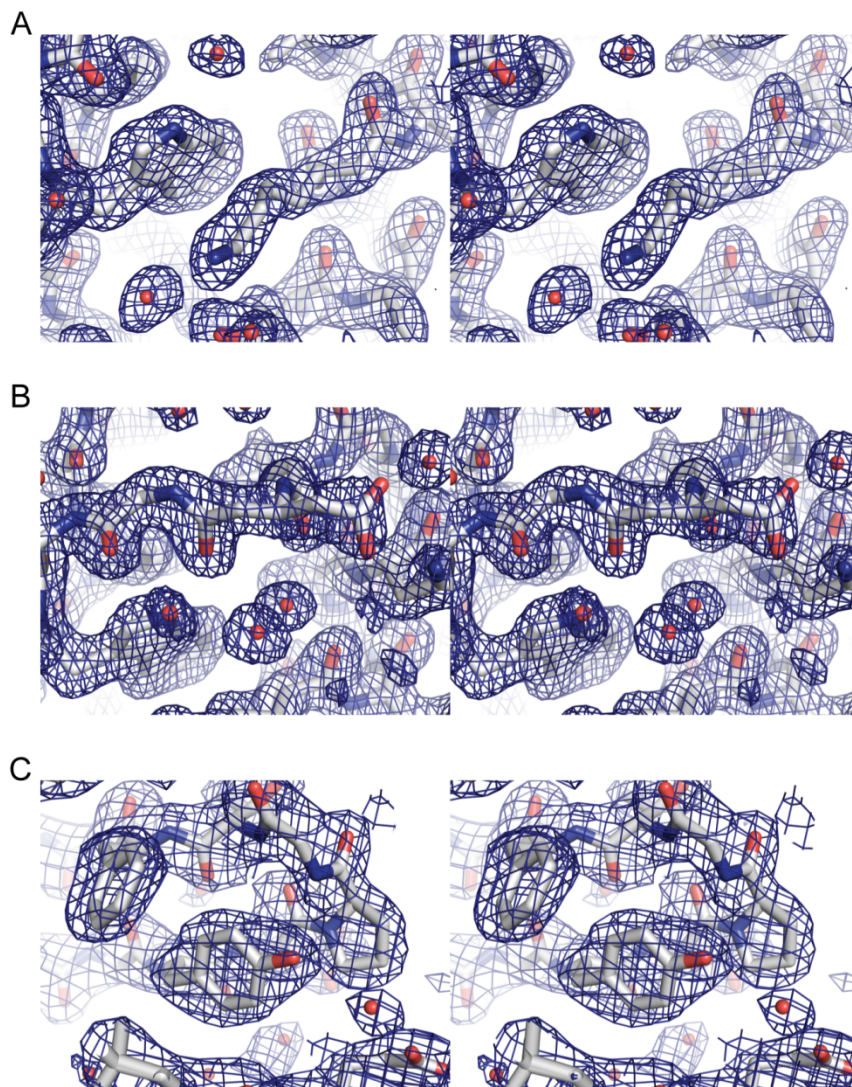

**Figure S5.** Stereo views of electron density ( $\sigma_a$  weighted  $2F_o - F_c$  maps) from the refined structures of protein 2 (A), protein 3 (B), and protein 5 (C).

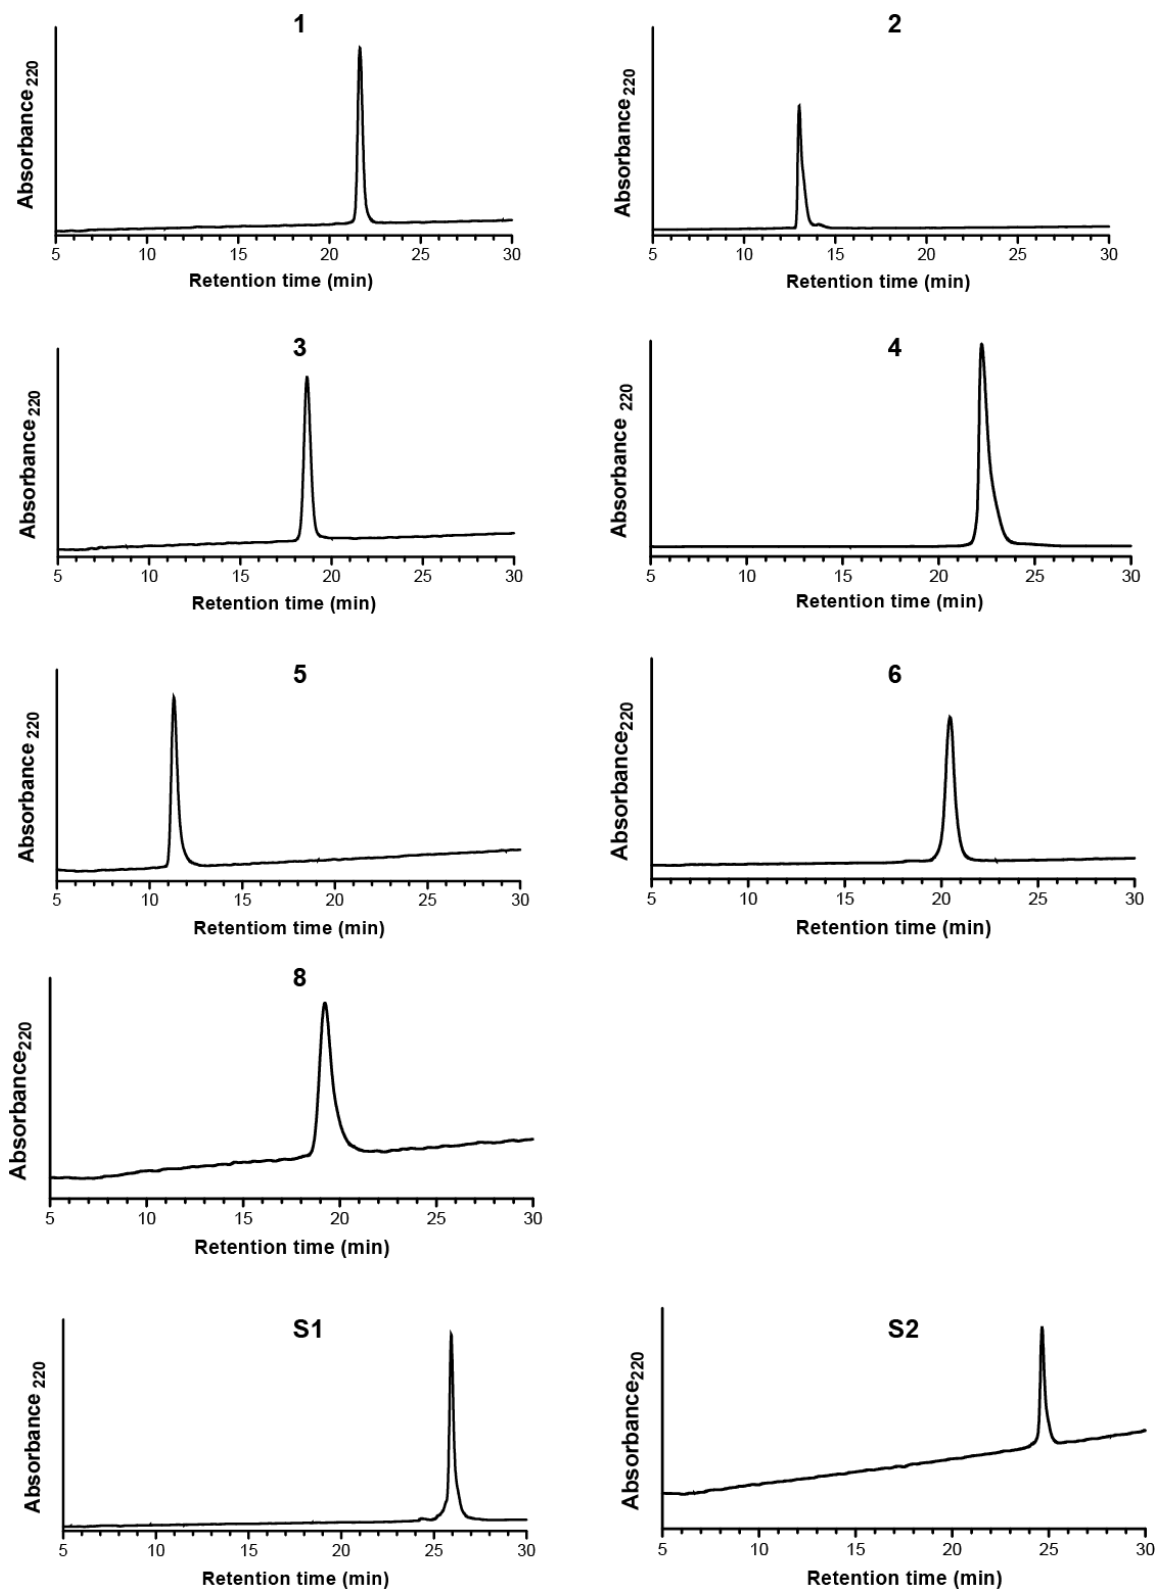

**Figure S6.** Analytical HPLC chromatograms of purified proteins 1-6, 8, S1, and S2.

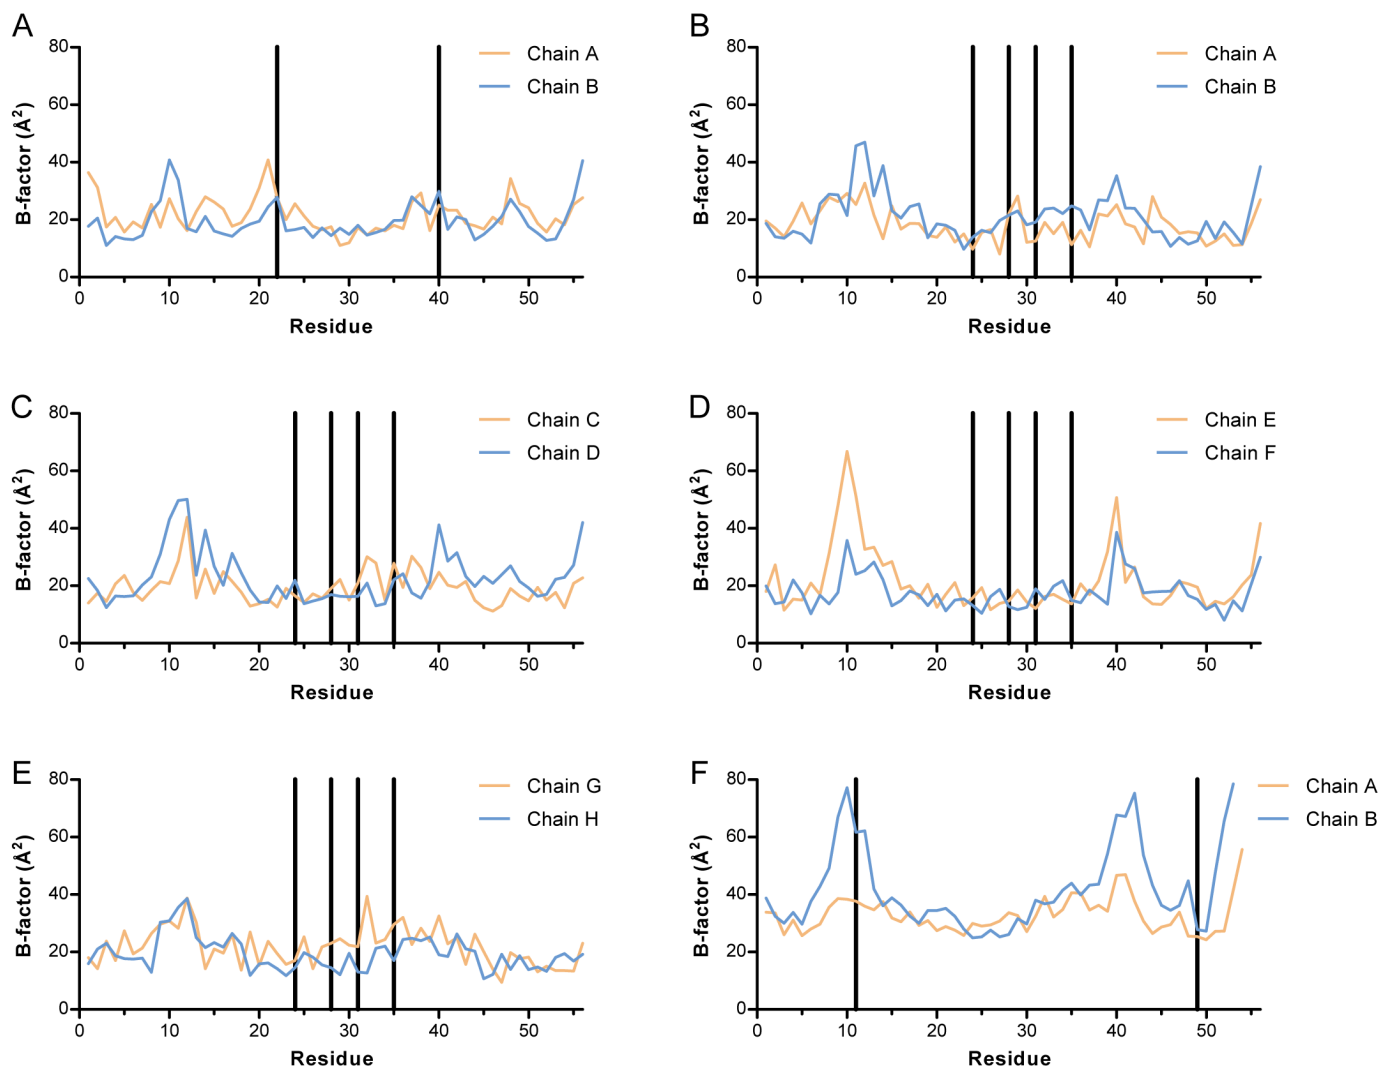

**Figure S7.** Plots of per-residue B-factors for each crystallographically independent chain in the crystal structures of **2** (A), **3** (B-E), and **5** (F). Positions of backbone alteration are marked with vertical lines.

**Table S1.** X-ray diffraction data collection and refinement statistics for proteins **2**, **3**, and **5**.

|                                 | Protein <b>2</b><br>(GB1-helix)                                                   | Protein <b>3</b><br>(GB1-loops)                                                       | Protein <b>5</b><br>(GB1-turns)                            |
|---------------------------------|-----------------------------------------------------------------------------------|---------------------------------------------------------------------------------------|------------------------------------------------------------|
| <b>PDB ID</b>                   | 4KGR                                                                              | 4KGS                                                                                  | 4KGT                                                       |
| <b>Data Collection</b>          |                                                                                   |                                                                                       |                                                            |
| Unit cell dimensions<br>(Å, °)  | $a = 52.2, b = 81.2$<br>$c = 52.1$<br>$\alpha = 90, \beta = 90,$<br>$\gamma = 90$ | $a = 80.7, b = 35.7,$<br>$c = 46.5$<br>$\alpha = 90, \beta = 120.4,$<br>$\gamma = 90$ | $a = b = 83.8, c = 97.5$<br>$\alpha = \beta = \gamma = 90$ |
| Space group                     | P2 <sub>1</sub>                                                                   | C2                                                                                    | I4 <sub>1</sub> 22                                         |
| Resolution (Å)                  | 32.03–2.00<br>(2.07–2.00)                                                         | 28.27–1.95<br>(2.02–1.95)                                                             | 23.28–2.00<br>(2.07–2.00)                                  |
| Total observations              | 97,753                                                                            | 51,377                                                                                | 166,708                                                    |
| Unique observations             | 27,508                                                                            | 8,453                                                                                 | 12,054                                                     |
| Redundancy                      | 3.55 (2.68)                                                                       | 6.08 (3.64)                                                                           | 13.83 (13.81)                                              |
| Completeness (%)                | 93.7 (82.7)                                                                       | 99.6 (96.3)                                                                           | 100 (100)                                                  |
| $I/\sigma$                      | 23.6 (5.1)                                                                        | 16.2 (4.1)                                                                            | 16.7 (4.5)                                                 |
| $R_{merge}$ (%)                 | 4.4 (20.3)                                                                        | 7.8 (22.5)                                                                            | 7.6 (39.6)                                                 |
| <b>Refinement</b>               |                                                                                   |                                                                                       |                                                            |
| Resolution (Å)                  | 32.03–2.00                                                                        | 28.27–1.95                                                                            | 23.28–2.00                                                 |
| $R$ (%)                         | 16.2                                                                              | 17.6                                                                                  | 19.8                                                       |
| $R_{free}$ (%)                  | 19.2                                                                              | 21.7                                                                                  | 21.0                                                       |
| Avg. B factor (Å <sup>2</sup> ) | 23.6                                                                              | 24.9                                                                                  | 39.4                                                       |
| RMSD                            |                                                                                   |                                                                                       |                                                            |
| Bonds (Å)                       | 0.011                                                                             | 0.008                                                                                 | 0.007                                                      |
| Angles (°)                      | 1.54                                                                              | 1.12                                                                                  | 1.05                                                       |

**Table S2.** MALDI-TOF MS data for synthetic proteins.

| #         | $[M+H]^+$ $m/z$ (avg.) |          |
|-----------|------------------------|----------|
|           | Calculated             | Observed |
| <b>1</b>  | 6179.6                 | 6178.6   |
| <b>2</b>  | 6235.8                 | 6232.8   |
| <b>3</b>  | 6207.7                 | 6204.4   |
| <b>4</b>  | 6207.7                 | 6207.5   |
| <b>5</b>  | 5831.2                 | 5828.5   |
| <b>6</b>  | 5943.5                 | 5944.1   |
| <b>8</b>  | 5995.6                 | 5997.8   |
| <b>S1</b> | 5789.3                 | 5791.5   |
| <b>S2</b> | 6271.9                 | 6274.6   |



## Experimental Methods

**Protein Synthesis and Purification.** Proteins were synthesized by automated methods on a PTI Tribute synthesizer using NovaPEG Rink Amide resin (70  $\mu\text{mol}$  scale). Coupling reactions were performed by combining 3.0 mL of 0.4 M *N*-methylmorpholine in DMF with 7 equivalents relative to resin of the Fmoc-amino acid and HCTU. All unnatural amino acids were purchased in suitably protected form, except for Fmoc- $\beta^2$ -Val-OH and Fmoc- $\beta^2$ -Tyr(*t*Bu)-OH, which were synthesized using published routes.<sup>1,2</sup> Following a two minute preactivation, the activated amino acid was added to the resin and vortexed for 45 min. Deprotection reactions were carried out twice with 3.0 mL of a 20% v/v solution of 4-methylpiperidine in DMF for 4 min. The resin was washed three times with 3 mL of DMF for 40 sec between each cycle. After the final deprotection step, the resin was washed with 3 mL of dichloromethane followed by 3 mL of methanol. Resin was dried and subjected to cleavage by treatment with a solution of 94% TFA, 1% triisopropylsilane, 2.5% water, and 2.5% ethanedithiol. Crude protein was precipitated by addition of cold diethyl ether. The solid was pelleted by centrifugation and dissolved in 6 M guanidinium chloride, 25 mM sodium phosphate, pH 6. This solution was subjected to purification by preparative C18 reverse-phase HPLC using gradients between 0.1% TFA in water and 0.1% TFA in acetonitrile. The identity of each protein was confirmed by MS analysis on a Voyager DE Pro MALDI-TOF instrument (Table S2). Each protein was subjected to a second purification by anion-exchange chromatography on a monoQ 5/50GL column (GE Healthcare) using 0.02 M Tris buffer at pH 8 and eluting with increasing concentrations of KCl. In the case of protein **8**, peak doubling was observed in the crude HPLC, which was attributed to partial N $\rightarrow$ O acyl transfer from backbone N to side-chain O at N-Me-Thr<sub>15</sub> under the strongly acidic conditions of resin cleavage.<sup>3</sup> Material containing mass corresponding to desired product was dissolved in 0.02 M phosphate buffer at pH 8 for 24 h (leading to rapid O $\rightarrow$ N acyl migration to the native amide),<sup>4</sup> subjected to a second round of HPLC purification and then ion exchange as detailed above. Final protein samples were  $\geq 95\%$  pure by analytical reverse-phase HPLC (Figure S6).

**Circular Dichroism Spectroscopy.** CD measurements were performed on an Olis DSM17 Circular Dichroism Spectrometer in 2 mm quartz cells. Samples consisted of 40  $\mu\text{M}$  protein in 20 mM sodium phosphate buffer, pH 7.0. Scans were carried out at 25  $^{\circ}\text{C}$  over the range of 200–260 nm with 1 nm increments and a 2 nm bandwidth. Scan data were smoothed by the Savitzky-Golay method. Melts were monitored at 220 nm over the range of 4  $^{\circ}\text{C}$  to 98  $^{\circ}\text{C}$  with 2  $^{\circ}\text{C}$  increments, a dead band of 0.5  $^{\circ}\text{C}$ , and a 2 min equilibration time at each temperature. All measurements were baseline corrected for blank buffer. Temperature-dependent CD data were fit to a two-state unfolding model to obtain melting temperature ( $T_m$ ). The change in free energy of folding for each mutant relative to wild-type ( $\Delta\Delta G_{\text{fold}}$ ) was estimated from the change in  $T_m$  ( $\Delta T_m$ ),<sup>5</sup> using the enthalpy of folding determined for GB1 by differential scanning calorimetry.<sup>6</sup>

**Protein Crystallization, X-ray Diffraction Data Collection, and Structure Determination.** Crystals of proteins **2**, **3**, and **5** were grown by hanging drop vapour diffusion from 17 mg/mL stock solutions of protein in water and well buffers as follows: 0.15 M sodium acetate pH 4.6, 20% w/v PEG 4000 for protein **2**; 0.1 M sodium acetate pH 4.6, 16% w/v PEG 3350 for protein **3**; and 0.1 M sodium acetate pH 4.6, 8% w/v PEG 4000 for protein **5**. A single crystal of each protein was flash frozen in liquid nitrogen after cryoprotection in well buffer supplemented with 30% v/v glycerol. Diffraction data were collected using CuK $\alpha$  radiation on a Rigaku/MSD diffractometer operated at 100 K. Raw diffraction data were indexed, integrated, and scaled with

d\*TREK. Structures of **2**, **3**, and **5** were solved by molecular replacement using a published structure of wild-type GB1 (PDB: 2QMT)<sup>7</sup> to generate the search model. Structure solution and refinement were carried out using the CCP4<sup>8</sup> and Phenix<sup>9</sup> software suites. In the case of protein **2** (GB1-helix), the diffraction pattern indexed as tetragonal, but subsequent analysis and structure determination revealed the actual lattice to be P2<sub>1</sub> with near perfect pseudomerohedral twinning (twin operator: L, -K, H). Refinement for **2** was performed using the twin refinement algorithm implemented in Phenix. Coordinates and structure factors for **2**, **3**, and **5** have been deposited in the Protein Data Bank under accession codes 4KGR, 4KGS, and 4KGT.

## References

1. Lengyel, G. A.; Frank, R. C.; Horne, W. S., *J. Am. Chem. Soc.* **2011**, *133*, 4246-4249.
2. Lengyel, G. A.; Horne, W. S., *J. Am. Chem. Soc.* **2012**, *134*, 15906-15913.
3. Oliyai, R.; Stella, V. J., *Pharm. Res.* **1992**, *9*, 617-22.
4. Mutter, M.; Chandravarkar, A.; Boyat, C.; Lopez, J.; Dos Santos, S.; Mandal, B.; Mimna, R.; Murat, K.; Patiny, L.; Saucède, L.; Tuchscherer, G., *Angew. Chem. Int. Ed.* **2004**, *43*, 4172-4178.
5. Bechtel, W. J.; Schellman, J. A., *Biopolymers* **1987**, *26*, 1859-1877.
6. Alexander, P.; Fahnestock, S.; Lee, T.; Orban, J.; Bryan, P., *Biochemistry* **1992**, *31*, 3597-3603.
7. Frericks Schmidt, H. L.; Sperling, L. J.; Gao, Y. G.; Wylie, B. J.; Boettcher, J. M.; Wilson, S. R.; Rienstra, C. M., *J. Phys. Chem. B* **2007**, *111*, 14362-14369.
8. *Acta Crystallogr., Sect D: Biol. Crystallogr.* **1994**, *50*, 760-3.
9. Adams, P. D.; Afonine, P. V.; Bunkoczi, G.; Chen, V. B.; Davis, I. W.; Echols, N.; Headd, J. J.; Hung, L.-W.; Kapral, G. J.; Grosse-Kunstleve, R. W.; McCoy, A. J.; Moriarty, N. W.; Oeffner, R.; Read, R. J.; Richardson, D. C.; Richardson, J. S.; Terwilliger, T. C.; Zwart, P. H., *Acta Crystallogr., Sect D: Biol. Crystallogr.* **2010**, *66*, 213-221.
